# Supplementary material
Source: PubMed Central journal article supplement (PMC6865321)
Supplement: jamaophthalmol-137-1416-s001.pdf [file jamaophthalmol-137-1416-s001.pdf]

## Supplementary Online Content

Garcia G-GP, Lavieri MS, Andrews C, et al. Accuracy of Kalman filtering in forecasting visual field and intraocular pressure trajectory in patients with ocular hypertension. *JAMA Ophthalmol*. Published online November 14, 2019. doi:10.1001/jamaophthalmol.2019.4190

**eTable 1.** Description of Eyes From OHTS Which Progressed Due to Changes in VF and Did Not Progress Due to Changes in VF

**eTable 2.** Proportion of Eyes From OHTS Patients With Forecasts of Pattern Standard Deviation Within 0.5, 1.0, and 2.5 dB, and Beyond 2.5 dB of the Actual Value at 12, 24, 36, 48, and 60 Months Into the Future for Each of the Five Forecasting Models

**eTable 3.** Proportion of Eyes from OHTS Patients With Forecasts of Intraocular Pressure Within 1.0, 2.5, and 5.0 mm Hg, and Beyond 5.0 mm Hg of the Actual Value at 12, 24, 36, 48, and 60 Months Into the Future for Each of the Five Forecasting Models

**eTable 4.** Proportion of Progressed Eyes from OHTS Patients With Forecasts of Mean Deviation Within 0.5, 1.0, and 2.5 dB, and Beyond 2.5 dB of the Actual Value at 12, 24, 36, 48, and 60 Months into the Future for Each of the Five Forecasting Models

**eTable 5.** Proportion of Progressed Eyes from OHTS Patients With Forecasts of Pattern Standard Deviation Within 0.5, 1.0, and 2.5 dB, and Beyond 2.5 dB of the Actual Value at 12, 24, 36, 48, and 60 Months Into the Future for Each of the Five Forecasting Models

**eTable 6.** Proportion of Progressed Eyes from OHTS Patients With Forecasts of Intraocular Pressure Within 1.0, 2.5, and 5.0 dB, and Beyond 5.0 dB of the Actual Value at 12, 24, 36, 48, and 60 Months Into the Future for Each of the Five Forecasting Models

**eTable 7.** Comparison of the Root Mean Square Error of the 5 Models at Forecasting Key Glaucoma Metrics for Progressed Eyes From OHTS Patients at 12, 24, 36, 48, and 60 Months Into the Future

**eTable 8.** Characteristics of Patients With Ocular Hypertension Stratified by Whether the KF-OHTN Model Accurately Forecasted Mean Deviation 60 Months Into the Future

**eFigure 1.** Forecast of Sample Patient With Ocular Hypertension From the OHTS Trial Comparing KF-OHTN With PM and KF-OHTN With LR1

**eFigure 2.** Violin Plots Showing the Proportion of MD Forecasting Errors Between 0.5, 1.0, and 2.5 dB of the Actual Value for Patients With Ocular Hypertension Who Progressed to Open-Angle Glaucoma

This supplementary material has been provided by the authors to give readers additional information about their work.

**eTable 1. Description of eyes from OHTS which progressed<sup>1</sup> due to changes in VF and did not progress due to changes in VF**

|                                | Eyes from OHTS which progressed <sup>1</sup> due to VF |           | Eyes from OHTS which did not progress <sup>2</sup> due to VF |           |                  |
|--------------------------------|--------------------------------------------------------|-----------|--------------------------------------------------------------|-----------|------------------|
|                                | <i>N</i>                                               |           | <i>N</i>                                                     |           |                  |
| No of Eyes                     | 108                                                    |           | 2698                                                         |           |                  |
|                                | <i>Mean</i>                                            | <i>SD</i> | <i>Mean</i>                                                  | <i>SD</i> | <i>p-value</i> * |
| Years to First Progression     | 6.8                                                    | 3.7       | -                                                            | -         | 0.38             |
| Initial MD (dB)                | -0.2                                                   | 1.4       | 0.0                                                          | 1.4       | 0.08             |
| Initial PSD (dB)               | 2.1                                                    | 0.4       | 2.0                                                          | 0.5       | 0.01             |
| Initial IOP (mmHg)             | 26.7                                                   | 3.4       | 25.1                                                         | 3.0       | <0.001           |
| MD change <sup>3</sup> (dB)    | -0.8                                                   | 1.6       | -0.2                                                         | 2.0       | <0.001           |
| PSD change <sup>3</sup> (dB)   | 0.7                                                    | 0.9       | 0.1                                                          | 0.9       | <0.001           |
| IOP change <sup>3</sup> (mmHg) | -0.5                                                   | 3.3       | -1.1                                                         | 3.4       | 0.05             |

\*P-values were computed using a 2-sample Student's t-test

<sup>1</sup>Progressed eyes were identified by the Endpoint Committee based on VF changes

<sup>2</sup>Some eyes in this group may have been identified by the Endpoint Committee as having progressed due to changes in the optic disc

<sup>3</sup>Change computed as: reading at 60 months - initial reading; statistic only computed for those with enough measurements

PSD = pattern standard deviation; IOP = intraocular pressure; MD = mean deviation; dB = decibels; SD = standard deviation; VF = visual field

**eTable 2. Proportion of Eyes from OHTS Patients with Forecasts of Pattern Standard Deviation within 0.5, 1.0, and 2.5 dB, and beyond 2.5 dB of the Actual Value at 12, 24, 36, 48, and 60 months into the Future for Each of the Five Forecasting Models**

| Months Forecasted Ahead | Amount of Error in PSD Forecast (dB) | KF-OHTN |       | KF-HTG <sup>1,2</sup> |       | PM <sup>2</sup> |       | LR1 <sup>1,2</sup> |       | LR2 <sup>1,2</sup> |       |
|-------------------------|--------------------------------------|---------|-------|-----------------------|-------|-----------------|-------|--------------------|-------|--------------------|-------|
|                         |                                      | # Eyes  | %     | # Eyes                | %     | # Eyes          | %     | # Eyes             | %     | # Eyes             | %     |
| 12                      | 0.5                                  | 2035    | 80.2% | 2088                  | 82.3% | 2137            | 84.2% | 1917               | 75.6% | 1935               | 76.3% |
|                         | 1                                    | 2372    | 93.5% | 2377                  | 93.7% | 2405            | 94.8% | 2316               | 91.3% | 2322               | 91.5% |
|                         | 2.5                                  | 2502    | 98.6% | 2504                  | 98.7% | 2503            | 98.7% | 2490               | 98.1% | 2484               | 97.9% |
|                         | >2.5                                 | 35      | 1.4%  | 33                    | 1.3%  | 34              | 1.3%  | 47                 | 1.9%  | 53                 | 2.1%  |
| 24                      | 0.5                                  | 1881    | 77.8% | 1585                  | 65.6% | 2004            | 82.9% | 1528               | 63.2% | 1524               | 63.0% |
|                         | 1                                    | 2227    | 92.1% | 2237                  | 92.5% | 2260            | 93.5% | 2062               | 85.3% | 2063               | 85.3% |
|                         | 2.5                                  | 2391    | 98.9% | 2392                  | 98.9% | 2390            | 98.8% | 2349               | 97.1% | 2347               | 97.1% |
|                         | >2.5                                 | 27      | 1.1%  | 26                    | 1.1%  | 28              | 1.2%  | 69                 | 2.9%  | 71                 | 2.9%  |
| 36                      | 0.5                                  | 1767    | 76.3% | 814                   | 35.1% | 1868            | 80.6% | 1259               | 54.3% | 1277               | 55.1% |
|                         | 1                                    | 2131    | 92.0% | 1961                  | 84.6% | 2170            | 93.7% | 1850               | 79.8% | 1874               | 80.9% |
|                         | 2.5                                  | 2280    | 98.4% | 2279                  | 98.4% | 2281            | 98.4% | 2217               | 95.7% | 2218               | 95.7% |
|                         | >2.5                                 | 37      | 1.6%  | 38                    | 1.6%  | 36              | 1.6%  | 100                | 4.3%  | 99                 | 4.3%  |
| 48                      | 0.5                                  | 1676    | 74.5% | 350                   | 15.6% | 1823            | 81.1% | 1085               | 48.2% | 1073               | 47.7% |
|                         | 1                                    | 2049    | 91.1% | 1408                  | 62.6% | 2085            | 92.7% | 1673               | 74.4% | 1681               | 74.7% |
|                         | 2.5                                  | 2194    | 97.6% | 2202                  | 97.9% | 2203            | 98.0% | 2115               | 94.0% | 2107               | 93.7% |
|                         | >2.5                                 | 55      | 2.4%  | 47                    | 2.1%  | 46              | 2.0%  | 134                | 6.0%  | 142                | 6.3%  |
| 60                      | 0.5                                  | 1402    | 66.0% | 150                   | 7.1%  | 1635            | 77.0% | 877                | 41.3% | 875                | 41.2% |
|                         | 1                                    | 1914    | 90.1% | 671                   | 31.6% | 1962            | 92.4% | 1464               | 68.9% | 1487               | 70.0% |
|                         | 2.5                                  | 2082    | 98.0% | 2075                  | 97.7% | 2085            | 98.2% | 1955               | 92.0% | 1955               | 92.0% |
|                         | >2.5                                 | 42      | 2.0%  | 49                    | 2.3%  | 39              | 1.8%  | 169                | 8.0%  | 169                | 8.0%  |

<sup>1</sup>This model had a significantly different distribution of prediction errors compared to the KF-OHTN model when predicting PSD 12 months into the future at a significance level of 0.01 based on the Bhapkar test for equality of marginal distributions.

<sup>2</sup>This model had a significantly different distribution of prediction errors compared to the KF-OHTN model when predicting PSD 60 months into the future at a significance level of 0.01 based on the Bhapkar test for equality of marginal distributions.

\*2537/2806 (90.4 %) of eyes from OHTS patients had enough measurements for this analysis

\*\*2124/2806 (75.7%) of eyes from OHTS patients had enough measurements for this analysis

dB = decibels; KF-OHTN = Kalman filter built using a sample of patients with ocular hypertension from OHTS; KF-HTG = Kalman filter built using a sample of patients with high-tension glaucoma; LR = linear regression; PSD = pattern standard deviation; PM = Personalized Mean model.

**eTable 3. Proportion of Eyes from OHTS Patients with Forecasts of Intraocular Pressure within 1.0, 2.5, and 5.0 mmHg, and beyond 5.0 mmHg of the Actual Value at 12, 24, 36, 48, and 60 months into the Future for Each of the Five Forecasting Models**

| Months Forecasted Ahead | Amount of Error in IOP Forecast (mmHg) | KF-OHTN |       | KF-HTG <sup>1,2</sup> |       | PM <sup>1,2</sup> |       | LR1 <sup>1,2</sup> |       | LR2 <sup>1,2</sup> |       |
|-------------------------|----------------------------------------|---------|-------|-----------------------|-------|-------------------|-------|--------------------|-------|--------------------|-------|
|                         |                                        | # Eyes  | %     | # Eyes                | %     | # Eyes            | %     | # Eyes             | %     | # Eyes             | %     |
| 12                      | 1                                      | 989     | 39.0% | 854                   | 33.7% | 916               | 36.1% | 729                | 28.7% | 792                | 31.2% |
|                         | 2.5                                    | 1955    | 77.1% | 1773                  | 69.9% | 1866              | 73.6% | 1619               | 63.8% | 1602               | 63.1% |
|                         | 5                                      | 2431    | 95.8% | 2378                  | 93.7% | 2409              | 95.0% | 2271               | 89.5% | 2257               | 89.0% |
|                         | >5                                     | 106     | 4.2%  | 159                   | 6.3%  | 128               | 5.0%  | 266                | 10.5% | 280                | 11.0% |
| 24                      | 1                                      | 797     | 33.0% | 781                   | 32.3% | 789               | 32.6% | 510                | 21.1% | 510                | 21.1% |
|                         | 2.5                                    | 1682    | 69.6% | 1646                  | 68.1% | 1711              | 70.8% | 1180               | 48.8% | 1183               | 48.9% |
|                         | 5                                      | 2258    | 93.4% | 2246                  | 92.9% | 2250              | 93.1% | 1850               | 76.5% | 1862               | 77.0% |
|                         | >5                                     | 160     | 6.6%  | 172                   | 7.1%  | 168               | 6.9%  | 568                | 23.5% | 556                | 23.0% |
| 36                      | 1                                      | 668     | 28.8% | 749                   | 32.3% | 701               | 30.3% | 395                | 17.0% | 401                | 17.3% |
|                         | 2.5                                    | 1477    | 63.7% | 1576                  | 68.0% | 1536              | 66.3% | 950                | 41.0% | 946                | 40.8% |
|                         | 5                                      | 2121    | 91.5% | 2090                  | 90.2% | 2091              | 90.2% | 1594               | 68.8% | 1579               | 68.1% |
|                         | >5                                     | 196     | 8.5%  | 227                   | 9.8%  | 226               | 9.8%  | 723                | 31.2% | 738                | 31.9% |
| 48                      | 1                                      | 574     | 25.5% | 665                   | 29.6% | 583               | 25.9% | 300                | 13.3% | 334                | 14.9% |
|                         | 2.5                                    | 1371    | 61.0% | 1392                  | 61.9% | 1321              | 58.7% | 742                | 33.0% | 739                | 32.9% |
|                         | 5                                      | 2002    | 89.0% | 1974                  | 87.8% | 1941              | 86.3% | 1328               | 59.0% | 1333               | 59.3% |
|                         | >5                                     | 247     | 11.0% | 275                   | 12.2% | 308               | 13.7% | 921                | 41.0% | 916                | 40.7% |
| 60                      | 1                                      | 560     | 26.4% | 517                   | 24.3% | 405               | 19.1% | 264                | 12.4% | 251                | 11.8% |
|                         | 2.5                                    | 1255    | 59.1% | 1118                  | 52.6% | 940               | 44.3% | 608                | 28.6% | 599                | 28.2% |
|                         | 5                                      | 1854    | 87.3% | 1703                  | 80.2% | 1594              | 75.0% | 1115               | 52.5% | 1108               | 52.2% |
|                         | >5                                     | 270     | 12.7% | 421                   | 19.8% | 530               | 25.0% | 1009               | 47.5% | 1016               | 47.8% |

<sup>1</sup>This model had a significantly different distribution of prediction errors compared to the KF-OHTN model when predicting IOP 12 months into the future at a significance level of 0.01 based on the Bhapkar test for equality of marginal distributions.

<sup>2</sup>This model had a significantly different distribution of prediction errors compared to the KF-OHTN model when predicting IOP 60 months into the future at a significance level of 0.01 based on the Bhapkar test for equality of marginal distributions.

\*2537/2806 (90.4 %) of eyes from OHTS patients had enough measurements for this analysis

\*\*2124/2806 (75.7%) of eyes from OHTS patients had enough measurements for this analysis

dB = decibels; KF-OHTN = Kalman filter built using a sample of patients with ocular hypertension from OHTS; KF-HTG = Kalman filter built using a sample of patients with high-tension glaucoma; LR = linear regression; IOP = intraocular pressure; PM = Personalized Mean model.

**eTable 4. Proportion of Progressed<sup>3</sup> Eyes from OHTS Patients with Forecasts of Mean Deviation within 0.5, 1.0, and 2.5 dB, and beyond 2.5 dB of the Actual Value at 12, 24, 36, 48, and 60 months into the Future for Each of the Five Forecasting Models**

| Months Forecasted Ahead | Amount of Error in MD Forecast (dB) | KF-OHTN |       | KF-HTG |       | PM <sup>2</sup> |       | LR1 <sup>1,2</sup> |       | LR2 <sup>2</sup> |       |
|-------------------------|-------------------------------------|---------|-------|--------|-------|-----------------|-------|--------------------|-------|------------------|-------|
|                         |                                     | # Eyes  | %     | # Eyes | %     | # Eyes          | %     | # Eyes             | %     | # Eyes           | %     |
| 12*                     | 0.5                                 | 33      | 39.8% | 30     | 36.1% | 37              | 44.6% | 24                 | 28.9% | 36               | 43.4% |
|                         | 1                                   | 54      | 65.1% | 55     | 66.3% | 58              | 69.9% | 41                 | 49.4% | 49               | 59.0% |
|                         | 2.5                                 | 80      | 96.4% | 78     | 94.0% | 78              | 94.0% | 77                 | 92.8% | 79               | 95.2% |
|                         | >2.5                                | 3       | 3.6%  | 5      | 6.0%  | 5               | 6.0%  | 6                  | 7.2%  | 4                | 4.8%  |
| 24                      | 0.5                                 | 21      | 29.6% | 19     | 26.8% | 21              | 29.6% | 14                 | 19.7% | 15               | 21.1% |
|                         | 1                                   | 40      | 56.3% | 37     | 52.1% | 40              | 56.3% | 30                 | 42.3% | 30               | 42.3% |
|                         | 2.5                                 | 66      | 93.0% | 65     | 91.5% | 67              | 94.4% | 54                 | 76.1% | 55               | 77.5% |
|                         | >2.5                                | 5       | 7.0%  | 6      | 8.5%  | 4               | 5.6%  | 17                 | 23.9% | 16               | 22.5% |
| 36                      | 0.5                                 | 24      | 40.7% | 22     | 37.3% | 20              | 33.9% | 13                 | 22.0% | 14               | 23.7% |
|                         | 1                                   | 37      | 62.7% | 36     | 61.0% | 32              | 54.2% | 23                 | 39.0% | 24               | 40.7% |
|                         | 2.5                                 | 56      | 94.9% | 54     | 91.5% | 53              | 89.8% | 41                 | 69.5% | 46               | 78.0% |
|                         | >2.5                                | 3       | 5.1%  | 5      | 8.5%  | 6               | 10.2% | 18                 | 30.5% | 13               | 22.0% |
| 48                      | 0.5                                 | 19      | 33.9% | 19     | 33.9% | 17              | 30.4% | 5                  | 8.9%  | 3                | 5.4%  |
|                         | 1                                   | 36      | 64.3% | 33     | 58.9% | 30              | 53.6% | 14                 | 25.0% | 15               | 26.8% |
|                         | 2.5                                 | 53      | 94.6% | 52     | 92.9% | 51              | 91.1% | 35                 | 62.5% | 35               | 62.5% |
|                         | >2.5                                | 3       | 5.4%  | 4      | 7.1%  | 5               | 8.9%  | 21                 | 37.5% | 21               | 37.5% |
| 60**                    | 0.5                                 | 13      | 29.5% | 13     | 29.5% | 7               | 15.9% | 3                  | 6.8%  | 2                | 4.5%  |
|                         | 1                                   | 30      | 68.2% | 30     | 68.2% | 22              | 50.0% | 8                  | 18.2% | 8                | 18.2% |
|                         | 2.5                                 | 41      | 93.2% | 41     | 93.2% | 41              | 93.2% | 24                 | 54.5% | 26               | 59.1% |
|                         | >2.5                                | 3       | 6.8%  | 3      | 6.8%  | 3               | 6.8%  | 20                 | 45.5% | 18               | 40.9% |

<sup>1</sup>This model had a significantly different distribution of prediction errors compared to the KF-OHTN model when predicting MD 12 months into the future at a significance level of 0.01 based on the Bhapkar test for equality of marginal distributions.

<sup>2</sup>This model had a significantly different distribution of prediction errors compared to the KF-OHTN model when predicting MD 60 months into the future at a significance level of 0.01 based on the Bhapkar test for equality of marginal distributions.

<sup>3</sup>Progressed eyes were identified by the Endpoint Committee due to changes in VF during the OHTS study

\*83/108 (76.9%) of progressed eyes from OHTS patients had enough measurements for this analysis

\*\*44/108 (40.7%) of progressed eyes from OHTS patients had enough measurements for this analysis

dB = decibels; KF-OHTN = Kalman filter built using a sample of patients with ocular hypertension from OHTS; KF-HTG = Kalman filter built using a sample of patients with high-tension glaucoma; LR = linear regression; MD = mean deviation; PM = Personalized Mean model.



**eTable 5. Proportion of Progressed<sup>3</sup> Eyes from OHTS Patients with Forecasts of Pattern Standard Deviation within 0.5, 1.0, and 2.5 dB, and beyond 2.5 dB of the Actual Value at 12, 24, 36, 48, and 60 months into the Future for Each of the Five Forecasting Models**

| Months Forecasted Ahead | Amount of Error in PSD Forecast (dB) | KF-OHTN |        | KF-HTG <sup>2</sup> |        | PM     |        | LR1    |       | LR2    |       |
|-------------------------|--------------------------------------|---------|--------|---------------------|--------|--------|--------|--------|-------|--------|-------|
|                         |                                      | # Eyes  | %      | # Eyes              | %      | # Eyes | %      | # Eyes | %     | # Eyes | %     |
| 12                      | 0.5                                  | 56      | 67.5%  | 60                  | 72.3%  | 58     | 69.9%  | 59     | 71.1% | 59     | 71.1% |
|                         | 1                                    | 77      | 92.8%  | 74                  | 89.2%  | 75     | 90.4%  | 73     | 88.0% | 74     | 89.2% |
|                         | 2.5                                  | 82      | 98.8%  | 82                  | 98.8%  | 81     | 97.6%  | 82     | 98.8% | 82     | 98.8% |
|                         | >2.5                                 | 1       | 1.2%   | 1                   | 1.2%   | 2      | 2.4%   | 1      | 1.2%  | 1      | 1.2%  |
| 24                      | 0.5                                  | 50      | 70.4%  | 44                  | 62.0%  | 51     | 71.8%  | 35     | 49.3% | 40     | 56.3% |
|                         | 1                                    | 58      | 81.7%  | 62                  | 87.3%  | 60     | 84.5%  | 60     | 84.5% | 60     | 84.5% |
|                         | 2.5                                  | 71      | 100.0% | 71                  | 100.0% | 71     | 100.0% | 70     | 98.6% | 69     | 97.2% |
|                         | >2.5                                 | 0       | 0.0%   | 0                   | 0.0%   | 0      | 0.0%   | 1      | 1.4%  | 2      | 2.8%  |
| 36                      | 0.5                                  | 37      | 62.7%  | 30                  | 50.8%  | 39     | 66.1%  | 28     | 47.5% | 30     | 50.8% |
|                         | 1                                    | 50      | 84.7%  | 53                  | 89.8%  | 51     | 86.4%  | 44     | 74.6% | 44     | 74.6% |
|                         | 2.5                                  | 58      | 98.3%  | 59                  | 100.0% | 58     | 98.3%  | 55     | 93.2% | 55     | 93.2% |
|                         | >2.5                                 | 1       | 1.7%   | 0                   | 0.0%   | 1      | 1.7%   | 4      | 6.8%  | 4      | 6.8%  |
| 48                      | 0.5                                  | 36      | 64.3%  | 23                  | 41.1%  | 35     | 62.5%  | 27     | 48.2% | 32     | 57.1% |
|                         | 1                                    | 52      | 92.9%  | 49                  | 87.5%  | 51     | 91.1%  | 42     | 75.0% | 42     | 75.0% |
|                         | 2.5                                  | 56      | 100.0% | 56                  | 100.0% | 56     | 100.0% | 53     | 94.6% | 54     | 96.4% |
|                         | >2.5                                 | 0       | 0.0%   | 0                   | 0.0%   | 0      | 0.0%   | 3      | 5.4%  | 2      | 3.6%  |
| 60                      | 0.5                                  | 31      | 70.5%  | 14                  | 31.8%  | 26     | 59.1%  | 18     | 40.9% | 18     | 40.9% |
|                         | 1                                    | 39      | 88.6%  | 29                  | 65.9%  | 36     | 81.8%  | 27     | 61.4% | 29     | 65.9% |
|                         | 2.5                                  | 44      | 100.0% | 44                  | 100.0% | 44     | 100.0% | 41     | 93.2% | 41     | 93.2% |
|                         | >2.5                                 | 0       | 0.0%   | 0                   | 0.0%   | 0      | 0.0%   | 3      | 6.8%  | 3      | 6.8%  |

<sup>1</sup>This model had a significantly different distribution of prediction errors compared to the KF-OHTN model when predicting MD 12 months into the future at a significance level of 0.01 based on the Bhapkar test for equality of marginal distributions.

<sup>2</sup>This model had a significantly different distribution of prediction errors compared to the KF-OHTN model when predicting MD 60 months into the future at a significance level of 0.01 based on the Bhapkar test for equality of marginal distributions.

<sup>3</sup>Progressed eyes were identified by the Endpoint Committee due to changes in VF during the OHTS study

\*83/108 (76.9%) of progressed eyes from OHTS patients had enough measurements for this analysis

\*\*44/108 (40.7%) of progressed eyes from OHTS patients had enough measurements for this analysis

dB = decibels; KF-OHTN = Kalman filter built using a sample of patients with ocular hypertension from OHTS; KF-HTG = Kalman filter built using a sample of patients with high-tension glaucoma; LR = linear regression; PSD = pattern standard deviation; PM = Personalized Mean model.

**eTable 6. Proportion of Progressed<sup>3</sup> Eyes from OHTS Patients with Forecasts of Intraocular Pressure within 1.0, 2.5, and 5.0 dB, and beyond 5.0 dB of the Actual Value at 12, 24, 36, 48, and 60 months into the Future for Each of the Five Forecasting Models**

| Months Forecasted Ahead | Amount of Error in IOP Forecast (mmHg) | KF-OHTN |       | KF-HTG |       | PM     |       | LR1 <sup>1,2</sup> |       | LR2 <sup>2</sup> |       |
|-------------------------|----------------------------------------|---------|-------|--------|-------|--------|-------|--------------------|-------|------------------|-------|
|                         |                                        | # Eyes  | %     | # Eyes | %     | # Eyes | %     | # Eyes             | %     | # Eyes           | %     |
| 12                      | 1                                      | 30      | 36.1% | 24     | 28.9% | 33     | 39.8% | 20                 | 24.1% | 21               | 25.3% |
|                         | 2.5                                    | 56      | 67.5% | 54     | 65.1% | 54     | 65.1% | 48                 | 57.8% | 46               | 55.4% |
|                         | 5                                      | 75      | 90.4% | 73     | 88.0% | 74     | 89.2% | 68                 | 81.9% | 67               | 80.7% |
|                         | >5                                     | 8       | 9.6%  | 10     | 12.0% | 9      | 10.8% | 15                 | 18.1% | 16               | 19.3% |
| 24                      | 1                                      | 14      | 19.7% | 21     | 29.6% | 18     | 25.4% | 13                 | 18.3% | 9                | 12.7% |
|                         | 2.5                                    | 41      | 57.7% | 41     | 57.7% | 43     | 60.6% | 28                 | 39.4% | 28               | 39.4% |
|                         | 5                                      | 64      | 90.1% | 61     | 85.9% | 64     | 90.1% | 52                 | 73.2% | 50               | 70.4% |
|                         | >5                                     | 7       | 9.9%  | 10     | 14.1% | 7      | 9.9%  | 19                 | 26.8% | 21               | 29.6% |
| 36                      | 1                                      | 13      | 22.0% | 21     | 35.6% | 23     | 39.0% | 7                  | 11.9% | 3                | 5.1%  |
|                         | 2.5                                    | 32      | 54.2% | 36     | 61.0% | 38     | 64.4% | 20                 | 33.9% | 14               | 23.7% |
|                         | 5                                      | 54      | 91.5% | 51     | 86.4% | 52     | 88.1% | 37                 | 62.7% | 34               | 57.6% |
|                         | >5                                     | 5       | 8.5%  | 8      | 13.6% | 7      | 11.9% | 22                 | 37.3% | 25               | 42.4% |
| 48                      | 1                                      | 10      | 17.9% | 12     | 21.4% | 14     | 25.0% | 5                  | 8.9%  | 4                | 7.1%  |
|                         | 2.5                                    | 25      | 44.6% | 30     | 53.6% | 31     | 55.4% | 13                 | 23.2% | 11               | 19.6% |
|                         | 5                                      | 46      | 82.1% | 45     | 80.4% | 45     | 80.4% | 25                 | 44.6% | 22               | 39.3% |
|                         | >5                                     | 10      | 17.9% | 11     | 19.6% | 11     | 19.6% | 31                 | 55.4% | 34               | 60.7% |
| 60                      | 1                                      | 10      | 22.7% | 7      | 15.9% | 4      | 9.1%  | 4                  | 9.1%  | 3                | 6.8%  |
|                         | 2.5                                    | 21      | 47.7% | 15     | 34.1% | 14     | 31.8% | 11                 | 25.0% | 6                | 13.6% |
|                         | 5                                      | 34      | 77.3% | 29     | 65.9% | 29     | 65.9% | 17                 | 38.6% | 16               | 36.4% |
|                         | >5                                     | 10      | 22.7% | 15     | 34.1% | 15     | 34.1% | 27                 | 61.4% | 28               | 63.6% |

<sup>1</sup>This model had a significantly different distribution of prediction errors compared to the KF-OHTN model when predicting IOP 12 months into the future at a significance level of 0.01 based on the Bhapkar test for equality of marginal distributions.

<sup>2</sup>This model had a significantly different distribution of prediction errors compared to the KF-OHTN model when predicting IOP 60 months into the future at a significance level of 0.01 based on the Bhapkar test for equality of marginal distributions.

<sup>3</sup>Progressed eyes were identified by the Endpoint Committee due to changes in VF during the OHTS study

\*83/108 (76.9%) of progressed eyes from OHTS patients had enough measurements for this analysis

\*\*44/108 (40.7%) of progressed eyes from OHTS patients had enough measurements for this analysis

dB = decibels; KF-OHTN = Kalman filter built using a sample of patients with ocular hypertension from OHTS; KF-HTG = Kalman filter built using a sample of patients with high-tension glaucoma; LR = linear regression; IOP = intraocular pressure; PM = Personalized Mean model.

**eTable 7. Comparison of the Root Mean Square Error of the 5 Models at Forecasting Key Glaucoma Metrics for Progressed<sup>1</sup> Eyes from OHTS patients at 12, 24, 36, 48, and 60 Months into the Future**

| Months Ahead | Metric | I F-OHTS* |               | KF-HTG |               | PM   |               | LR1  | LR2  |               |
|--------------|--------|-----------|---------------|--------|---------------|------|---------------|------|------|---------------|
|              |        | RMSE      | % Improvement | RMSE   | % Improvement | RMSE | % Improvement | RMSE | RMSE | % Improvement |
| 12           | MD     | 1.21      | 11.1%         | 1.29   | 4.8%          | 1.39 | -2.1%         | 1.36 | 1.29 | 4.8%          |
| 24           |        | 1.46      | 31.4%         | 1.43   | 32.9%         | 1.41 | 33.8%         | 2.13 | 2.09 | 1.8%          |
| 36           |        | 1.39      | 40.6%         | 1.31   | 44.1%         | 1.51 | 35.4%         | 2.34 | 2.25 | 3.7%          |
| 48           |        | 1.60      | 46.5%         | 1.48   | 50.5%         | 1.82 | 39.0%         | 2.99 | 2.89 | 3.5%          |
| 60           |        | 1.20      | 64.9%         | 1.19   | 64.9%         | 1.40 | 58.7%         | 3.40 | 3.28 | 3.6%          |
| 12           | PSD    | 0.63      | 2.9%          | 0.64   | 0.3%          | 0.74 | -15.4%        | 0.65 | 0.65 | -0.2%         |
| 24           |        | 0.67      | 25.5%         | 0.61   | 32.5%         | 0.64 | 28.6%         | 0.90 | 0.90 | -0.4%         |
| 36           |        | 0.71      | 33.1%         | 0.70   | 34.4%         | 0.73 | 31.7%         | 1.07 | 1.07 | -0.5%         |
| 48           |        | 0.56      | 49.1%         | 0.75   | 31.8%         | 0.62 | 43.8%         | 1.10 | 1.10 | 0.0%          |
| 60           |        | 0.58      | 51.8%         | 0.95   | 20.5%         | 0.67 | 43.8%         | 1.20 | 1.16 | 3.0%          |
| 12           | IOP    | 2.94      | 22.0%         | 3.29   | 12.8%         | 3.01 | 20.1%         | 3.77 | 3.95 | -4.7%         |
| 24           |        | 3.13      | 39.7%         | 3.36   | 35.3%         | 2.97 | 42.8%         | 5.19 | 5.44 | -4.8%         |
| 36           |        | 3.17      | 47.2%         | 3.19   | 46.8%         | 3.10 | 48.3%         | 6.00 | 5.93 | 1.1%          |
| 48           |        | 3.97      | 48.0%         | 4.04   | 47.1%         | 3.99 | 47.8%         | 7.64 | 7.57 | 1.0%          |
| 60           |        | 4.46      | 46.8%         | 5.33   | 36.5%         | 6.06 | 27.7%         | 8.38 | 8.12 | 3.1%          |

RMSE values closer to 0 indicate predictions closer to the actual values obtained in the trial / clinic. % Improvement measured with respect to the LR1 model and computed as  $(RMSE_{LR1} - RMSE_M) / (RMSE_{LR1})$  where  $RMSE_M$  is the RMSE belonging to the KF-OHTN, KF-HTG, PM, or LR2 model. Positive values of % Improvement indicates improved performance compared to the LR1 model.

<sup>1</sup>Progressed eyes were identified by the Endpoint Committee due to changes in VF during the OHTS study

\*RMSE estimated using leave-one-out cross validation.

IOP = intraocular pressure; KF-OHTN = Kalman filter built using a sample of patients with ocular hypertension from OHTS; KF-HTG = Kalman filter built using a sample of patients with high-tension glaucoma; LR = linear regression; MD = mean deviation; PM = Personalized Mean model; PSD = pattern standard deviation; RMSE = root mean square error.

**eTable 8. Characteristics of Patients with Ocular Hypertension stratified by whether the KF-OHTN Model Accurately Forecasted Mean Deviation 60 Months Into the Future**

|                                | Characteristics of Eyes Whose Mean Deviation Was Accurately Forecasted |           | Characteristics of Eyes Whose Mean Deviation Was Forecasted >2.5 dB Higher Than Actual Value |           | Characteristics of Eyes Whose Mean Deviation Was Forecasted >2.5 dB Lower Than Actual Value |           |                                               |                                                       |                                                      |
|--------------------------------|------------------------------------------------------------------------|-----------|----------------------------------------------------------------------------------------------|-----------|---------------------------------------------------------------------------------------------|-----------|-----------------------------------------------|-------------------------------------------------------|------------------------------------------------------|
|                                | <i>N</i>                                                               |           | <i>N</i>                                                                                     |           | <i>N</i>                                                                                    |           |                                               |                                                       |                                                      |
| No of Eyes                     | 1980                                                                   |           | 88                                                                                           |           | 56                                                                                          |           |                                               |                                                       |                                                      |
|                                | <i>Mean</i>                                                            | <i>SD</i> | <i>Mean</i>                                                                                  | <i>SD</i> | <i>Mean</i>                                                                                 | <i>SD</i> | <i>3 Group Comparison P-value<sup>2</sup></i> | <i>High vs. Accurate Forecast P-value<sup>3</sup></i> | <i>Low vs. Accurate Forecast P-value<sup>4</sup></i> |
| Initial MD (dB)                | 0.1                                                                    | 1.4       | 0.0                                                                                          | 1.4       | -0.4                                                                                        | 1.4       | 0.06                                          | 0.81                                                  | 0.06                                                 |
| Initial PSD (dB)               | 2.0                                                                    | 0.5       | 2.1                                                                                          | 0.5       | 2.0                                                                                         | 0.4       | 0.18                                          | 0.17                                                  | 0.92                                                 |
| Initial IOP (mmHg)             | 25.1                                                                   | 2.9       | 25.4                                                                                         | 3.3       | 24.5                                                                                        | 2.7       | 0.15                                          | 0.60                                                  | 0.22                                                 |
| MD change <sup>1</sup> (dB)    | 0.0                                                                    | 1.5       | -1.7                                                                                         | 5.1       | 0.6                                                                                         | 3.9       | <0.001                                        | <0.001                                                | 0.06                                                 |
| PSD change <sup>1</sup> (dB)   | 0.1                                                                    | 0.7       | 0.8                                                                                          | 1.8       | -0.4                                                                                        | 1.8       | <0.001                                        | <0.001                                                | <0.001                                               |
| IOP change <sup>1</sup> (mmHg) | -1.3                                                                   | 3.2       | -1.6                                                                                         | 3.8       | 0.7                                                                                         | 3.8       | <0.001                                        | 0.63                                                  | <0.001                                               |

Prediction error is defined as forecasted value – actual value. “Accurately Forecasted” means the forecasted value is within 2.5dB of the actual value observed in the trial or clinic visit. <sup>1</sup>Change computed as: reading at 60 months - initial reading <sup>2</sup>p-value simultaneously compares non-outliers, prediction error >2.5, and prediction error <-2.5 dB using 1-way ANOVA unless otherwise specified <sup>3</sup>p-value compares Non-outliers with Prediction error > 2.5 dB using Tukey’s post-hoc method <sup>4</sup>p-value compares Non-outliers with Prediction error <-2.5 dB using Tukey’s post-hoc method \*p-value computed using Pearson’s Chi-square test for independent samples \*\*2124/2806 (90.4%) patients with OHTN had enough measurements for this analysis  
MD = mean deviation; PSD = pattern standard deviation; SD = standard deviation; IOP = intraocular pressure; dB = decibels; OHTN = ocular hypertension; KF-OHTN = Kalman filter built using a sample of patients with OHTN

eFigure 1: Forecast of sample patient with ocular hypertension from the OHTS trial comparing [A] KF-OHTN with PM and [B] KF-OHTN with LR1

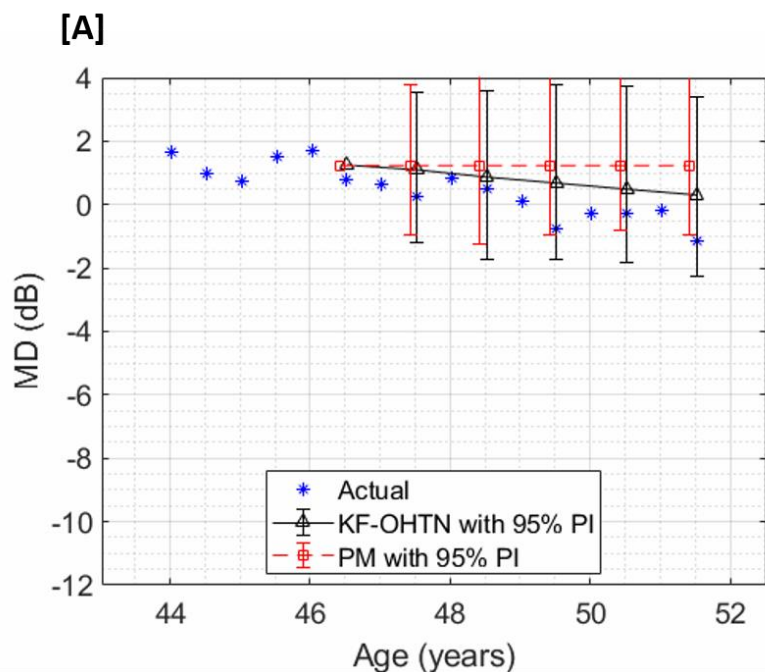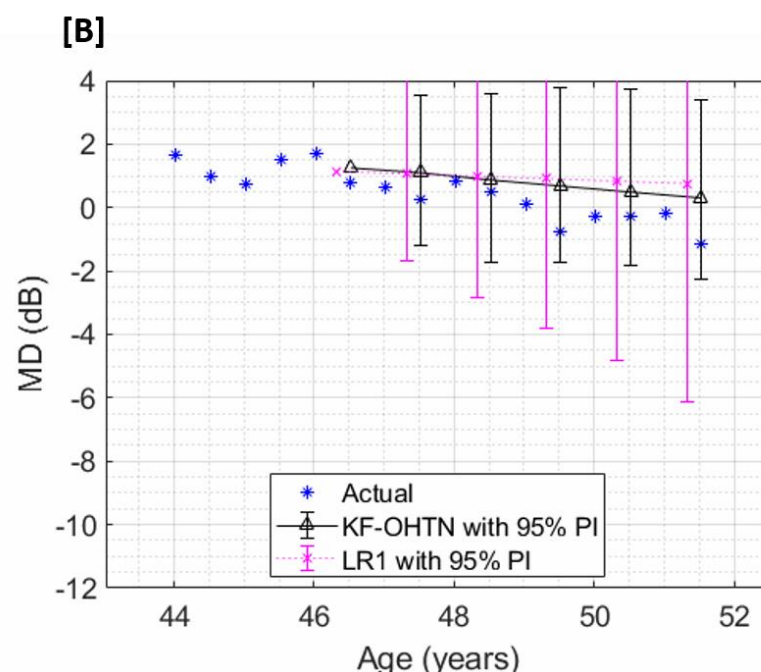

OHTS = Ocular Hypertension Treatment Study; KF-OHTN = Kalman filter model parameterized using patients with ocular hypertension; PM = personalized mean; LR1 = linear regression 1; Observed = actual measurements; Filtered = self-corrected past forecasts; Predicted = forecasted measurements; MD = Mean deviation; dB = decibels; IOP = intraocular pressure

**eFigure 2: Violin plots showing the proportion of MD forecasting errors between 0.5, 1.0, and 2.5 dB of the actual value for patients with ocular hypertension who progressed to open-angle glaucoma.**

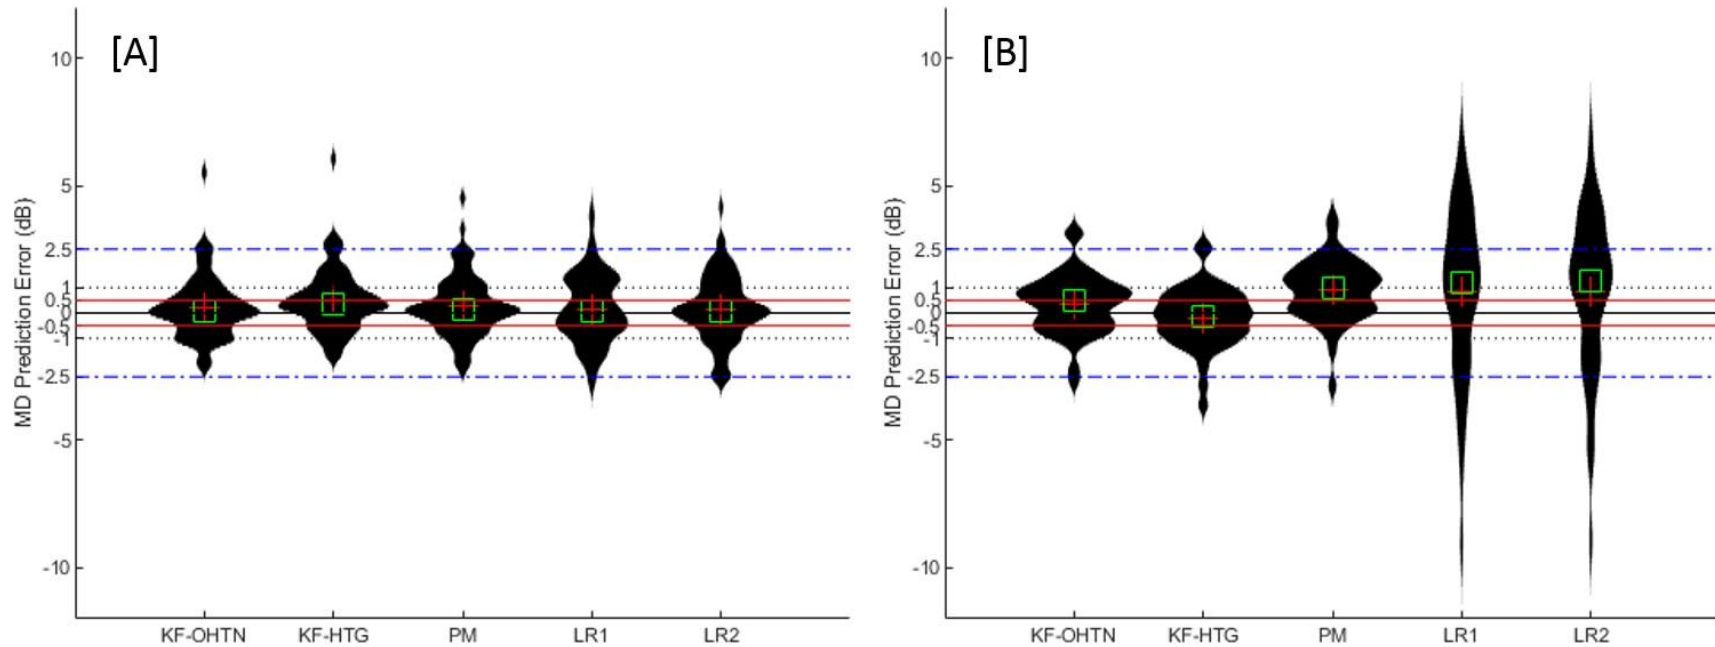

Progression from ocular hypertension to open-angle glaucoma was determined by the Endpoint Committee; [A] forecasting 12 months into the future; [B] forecasting 60 months into the future; KF-OHTN = Kalman filter model parameterized using patients with ocular hypertension; KF-HTG = Kalman filter model parameterized using patients with high tension glaucoma; PM = personalized mean model; LR1 = linear regression 1 model; LR2 = linear regression 2 model; MD = mean deviation; dB = decibels
